# Supplementary material for: Biomolecules to Biomarkers? U87MG Marker Evaluation on the Path towards Glioblastoma Multiforme Pathogenesis
Source: MDPI journal article supplement (doi:10.3390/pharmaceutics16010123), 2024-01-18
Supplement: s1 [file s1]

# Supplementary Materials: Biomolecules to Biomarkers?

## U87MG Marker Evaluation on the Path towards Glioblastoma Multiforme Pathogenesis

Markéta Pokorná, Viera Kútňá, Saak V. Ovsepián, Radoslav Matěj, Marie Černá and Valerie Bríd O'Leary

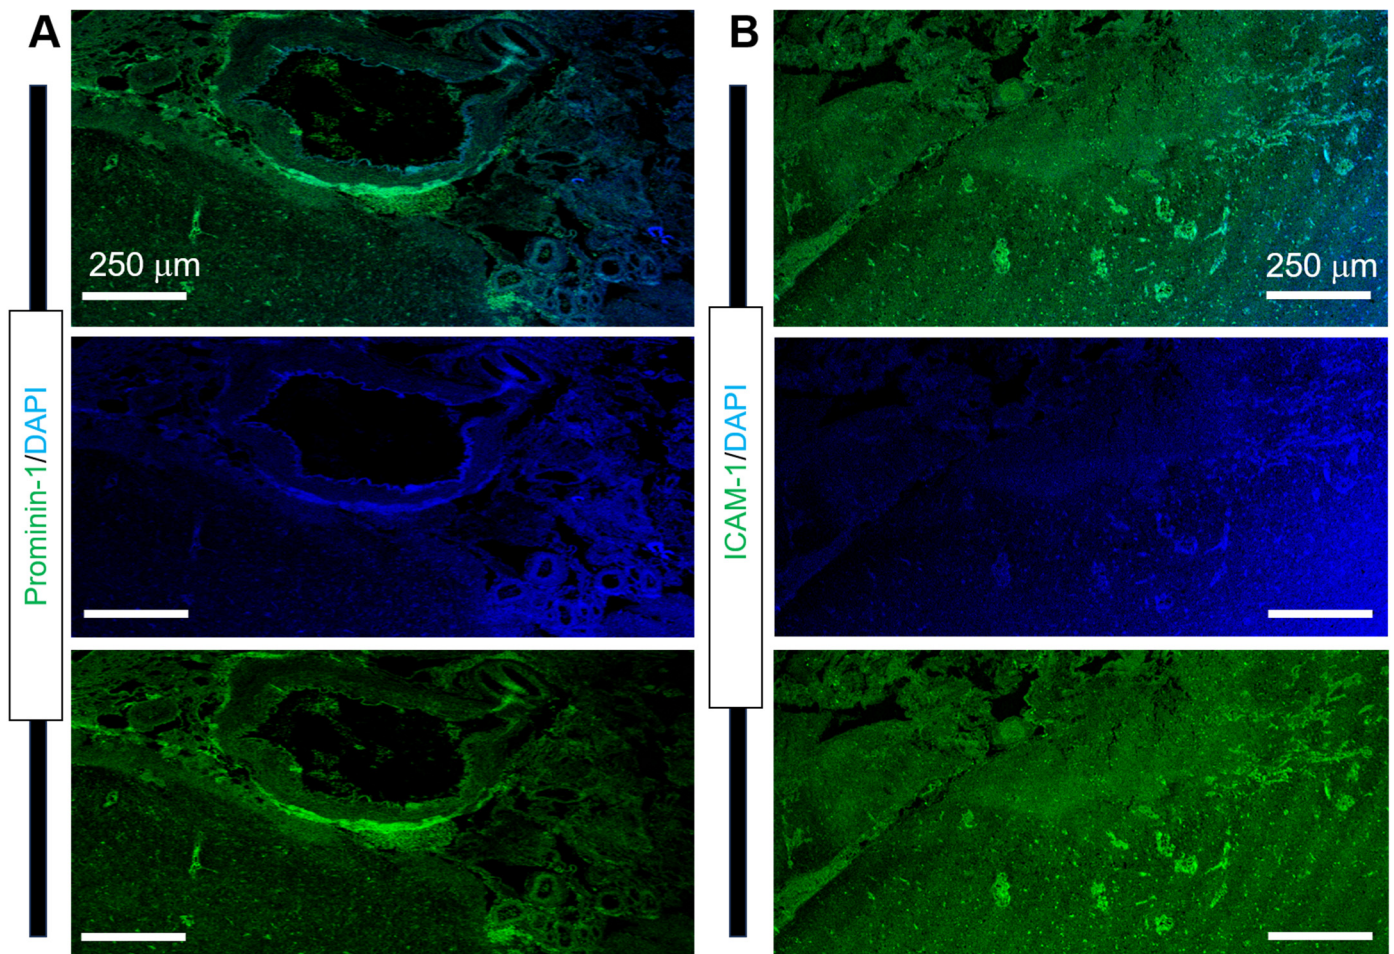

**Figure S1.** Low magnification confocal micrographs of Prominin-1 or ICAM-1 expression in GBM. (A) Representative confocal microscopic 5 X image of Prominin-1 (green, upper, and lower), nuclear staining (DAPI, blue, middle) in GBM. (B) Representative confocal microscopic 5 X image of ICAM-1 (green, upper, and lower), nuclear staining (DAPI, blue, middle) in GBM. Scale bar 250 mm.
